# Supplementary material
Source: publisher figshare collection journal article supplement (https://adisjournals.figshare.com/ndownloader/files/35793272)
Supplement: Supplementary file 1 [file 35793272]

Analysis of Blood Glucose Fluctuations Using a Continuous Glucose Monitoring System in Elderly Patients with Diabetes Mellitus and End-Stage Renal Disease on Maintenance Hemodialysis- An Observational Study

Jinzhu Li; Ruiqin Zhang; Zhen Wu; Jiayu Guo; Zhiying Wang; Shuhui Li; Chunlin Li; Guang Yang; Xiaoling Cheng  
DOI:10.1007/s13300-022-01274-4

Patients

Age≥65      With T2DM and ESRD      Undergoing maintain hemodialysis

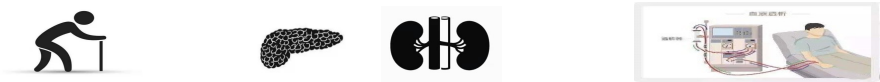

Methods

CGMS was applied, 13 pairs of CGMS data were collected

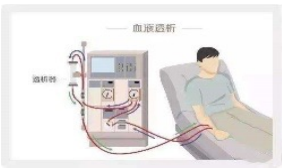

Dialysis-on day (n=13)

VS

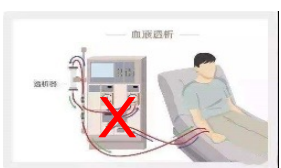

Dialysis-off day (n=13)

Results

An inverted U-shape was observed from the beginning of hemodialysis to 2 hours post-hemodialysis. (8 a.m. to 2 p.m.)

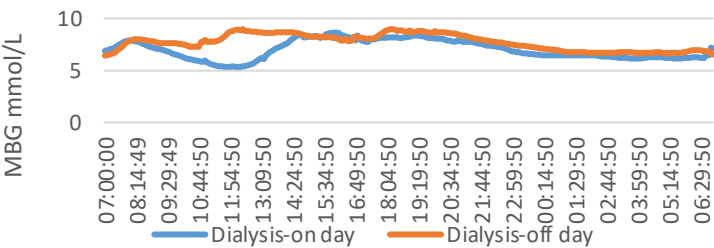

Hyperglycemia happened more on dialysis-on day

|                  | Hypoglycemia frequency |                         |                            |                               |                  |
|------------------|------------------------|-------------------------|----------------------------|-------------------------------|------------------|
|                  | Totally                | During dialysis<br>8-12 | Within post-HD 2h<br>12-14 | Afternoon to evening<br>14-22 | At night<br>22-8 |
| dialysis-on day  | 12                     | 2                       | 4                          | 3                             | 3                |
| dialysis-off day | 3                      | 1                       | 0                          | 0                             | 2                |

Conclusions: HD not only increased the amplitude of glycemic excursion, but also increased the risk of hypoglycemia. Furthermore, the effect of dialysis on blood glucose levels was usually maintained from the initiation of hemodialysis to 2 hours post-hemodialysis.
